# Supplementary material
Source: PubMed Central journal article supplement (PMC4624262)
Supplement: NIHMS65726-supplement-Table_3.pdf [file NIHMS65726-supplement-Table_3.pdf]

**Table 3 Change of angle width over time in treated and untreated eyes [mean (95%CI)]<sup>§</sup>**

| <b>Treated Eyes</b>                               |  | <b>Angle Width(°)</b> | <b>AOD250<sup>§</sup>(μm)</b> | <b>AOD500<sup>§</sup>(μm)</b> | <b>AOD750<sup>§</sup>(μm)</b> | <b>TISA500<sup>§</sup><br/>(X1000 μm<sup>2</sup>)</b>  | <b>TISA750<sup>§</sup><br/>(X 1000 μm<sup>2</sup>)</b> | <b>ARA<sup>§</sup><br/>(X 1000 μm<sup>2</sup>)</b> |
|---------------------------------------------------|--|-----------------------|-------------------------------|-------------------------------|-------------------------------|--------------------------------------------------------|--------------------------------------------------------|----------------------------------------------------|
| <b>Baseline</b>                                   |  | 13.5<br>(13.1, 13.9)  | 68.1<br>(64.0, 72.2)          | 93.2<br>(88.6, 97.8)          | 142.2<br>(135.9, 148.5)       | 57.3<br>(54.8, 59.7)                                   | 101.3<br>(97.6, 105.1)                                 | 116.0<br>(111.0, 121.0)                            |
| <b>Post-LPI<sup>§</sup> 2<sup>nd</sup> week</b>   |  | 25.7<br>(25.2, 26.2)  | 106.0<br>(101.0, 111.0)       | 155.6<br>(150.0, 161.2)       | 235.2<br>(227.7, 242.6)       | 81.9<br>(79.0, 84.7)                                   | 150.8<br>(146.5, 155.2)                                | 175.5<br>(161.2, 181.8)                            |
| <b>Post-LPI<sup>§</sup> 6<sup>th</sup> month</b>  |  | 25.2<br>(24.7, 25.7)  | 109.5<br>(104.3, 114.6)       | 154.0<br>(148.7, 159.2)       | 228.1<br>(221.5, 234.7)       | 83.9<br>(81.0, 86.8)                                   | 150.7<br>(146.4, 154.9)                                | 185.5<br>(178.1, 193.0)                            |
| <b>Post-LPI<sup>§</sup> 18<sup>th</sup> month</b> |  | 24.0<br>(23.5, 24.5)  | 93.7<br>(88.2, 99.1)          | 139.8<br>(133.5, 146.0)       | 217.6<br>(209.9, 225.3)       | 72.2<br>(68.9, 75.5)                                   | 136.8<br>(131.4, 142.2)                                | 156.7<br>(149.1, 164.3)                            |
| <b>P values<sup>†</sup></b>                       |  | <0.001                | <0.001                        | <0.001                        | <0.001                        | <0.001                                                 | <0.001                                                 | <0.001                                             |
| <b>Untreated Eyes</b>                             |  | <b>Angle Width(°)</b> | <b>AOD250<sup>§</sup>(μm)</b> | <b>AOD500<sup>§</sup>(μm)</b> | <b>AOD750<sup>§</sup>(μm)</b> | <b>TISA500<sup>§</sup><br/>(X 1000 μm<sup>2</sup>)</b> | <b>TISA750<sup>§</sup><br/>(X 1000 μm<sup>2</sup>)</b> | <b>ARA<sup>§</sup><br/>(X 1000 μm<sup>2</sup>)</b> |
| <b>Baseline</b>                                   |  | 13.5<br>(13.1, 13.9)  | 63.4<br>(59.3, 67.5)          | 86.5<br>(81.9, 91.2)          | 136.4<br>(130.2, 142.6)       | 53.9<br>(51.4, 56.3)                                   | 96.4<br>(92.7, 100.2)                                  | 110.6<br>(105.5, 115.6)                            |
| <b>Post-LPI<sup>§</sup> 2<sup>nd</sup> week</b>   |  | 13.7<br>(13.2, 14.1)  | 73.2<br>(65.7, 80.7)          | 98.8<br>(91.3, 106.4)         | 149.9<br>(141.7, 158.2)       | 60.4<br>(56.5, 64.2)                                   | 106.4<br>(100.7, 112.1)                                | 128.1<br>(113.1, 143.0)                            |
| <b>Post-LPI<sup>§</sup> 6<sup>th</sup> month</b>  |  | 12.2<br>(11.8, 12.6)  | 66.5<br>(62.3, 70.7)          | 83.8<br>(79.2, 88.4)          | 131.4<br>(125.2, 137.6)       | 56.1<br>(53.6, 58.6)                                   | 96.9<br>(93.1, 100.7)                                  | 115.9<br>(110.4, 121.4)                            |
| <b>Post-LPI<sup>§</sup> 18<sup>th</sup> month</b> |  | 11.3<br>(10.9, 11.7)  | 48.3<br>(44.1, 52.5)          | 69.0<br>(64.3, 73.8)          | 119.6<br>(113.1, 126.1)       | 42.3<br>(39.6, 45.0)                                   | 78.6<br>(74.4, 82.7)                                   | 88.0<br>(82.5, 93.5)                               |
| <b>P values<sup>†</sup></b>                       |  | <0.001                | <0.001                        | <0.001                        | <0.001                        | <0.001                                                 | <0.001                                                 | <0.001                                             |

§ CI: confidence interval; AOD: angle opening distance; TISA: trabecular-iris space area; ARA: angle recess area. LPI: laser peripheral iridotomy

† The difference across all visits was analyzed using repeated measures analysis of variance.
