# Supplementary material
Source: PubMed Central journal article supplement (PMC4624262)
Supplement: NIHMS65726-supplement-Table_4.pdf [file NIHMS65726-supplement-Table_4.pdf]

**Table 4 Statistical significance of inter-visit comparisons of angle width in treated and untreated eyes at post-LPI visits<sup>†</sup>**

| Post-LPI visits     | Treated eyes |                     |                     |                     |                      |                      |                  | Untreated eyes |                     |                     |                     |                      |                      |                  |
|---------------------|--------------|---------------------|---------------------|---------------------|----------------------|----------------------|------------------|----------------|---------------------|---------------------|---------------------|----------------------|----------------------|------------------|
|                     | Angle Width  | AOD250 <sup>§</sup> | AOD500 <sup>§</sup> | AOD750 <sup>§</sup> | TISA500 <sup>§</sup> | TISA750 <sup>§</sup> | ARA <sup>§</sup> | Angle Width    | AOD250 <sup>§</sup> | AOD500 <sup>§</sup> | AOD750 <sup>§</sup> | TISA500 <sup>§</sup> | TISA750 <sup>§</sup> | ARA <sup>§</sup> |
| 2-week vs 6-month   | 0.18         | 0.28                | 0.81                | 0.07                | 0.24                 | 1.00                 | 0.008            | <0.001         | 0.09                | <0.001              | <0.001              | 0.026                | <0.001               | 0.13             |
| 6-month vs 18-month | <0.001       | <0.001              | <0.001              | 0.003               | <0.001               | <0.001               | <0.001           | <0.001         | <0.001              | <0.001              | 0.001               | <0.001               | <0.001               | <0.001           |
| 2-week vs 18-month  | <0.001       | <0.001              | <0.001              | <0.001              | <0.001               | <0.001               | <0.001           | <0.001         | <0.001              | <0.001              | <0.001              | <0.001               | <0.001               | <0.001           |

<sup>†</sup>P values from Tukey's multiple pairwise comparisons following one-way repeated measures analysis of variance, LPI: laser peripheral iridotomy

<sup>§</sup> AOD: angle opening distance; TISA: trabecular-iris space area; ARA: angle recess area.
